# Supplementary material
Source: publisher site journal article supplement (https://www.dovepress.com/article/417501)
Supplement: Supplementary file 1 [file get_supplementary_file.php]

# Supplementarymaterial

# Supplementary Figures

**Figure S1.**


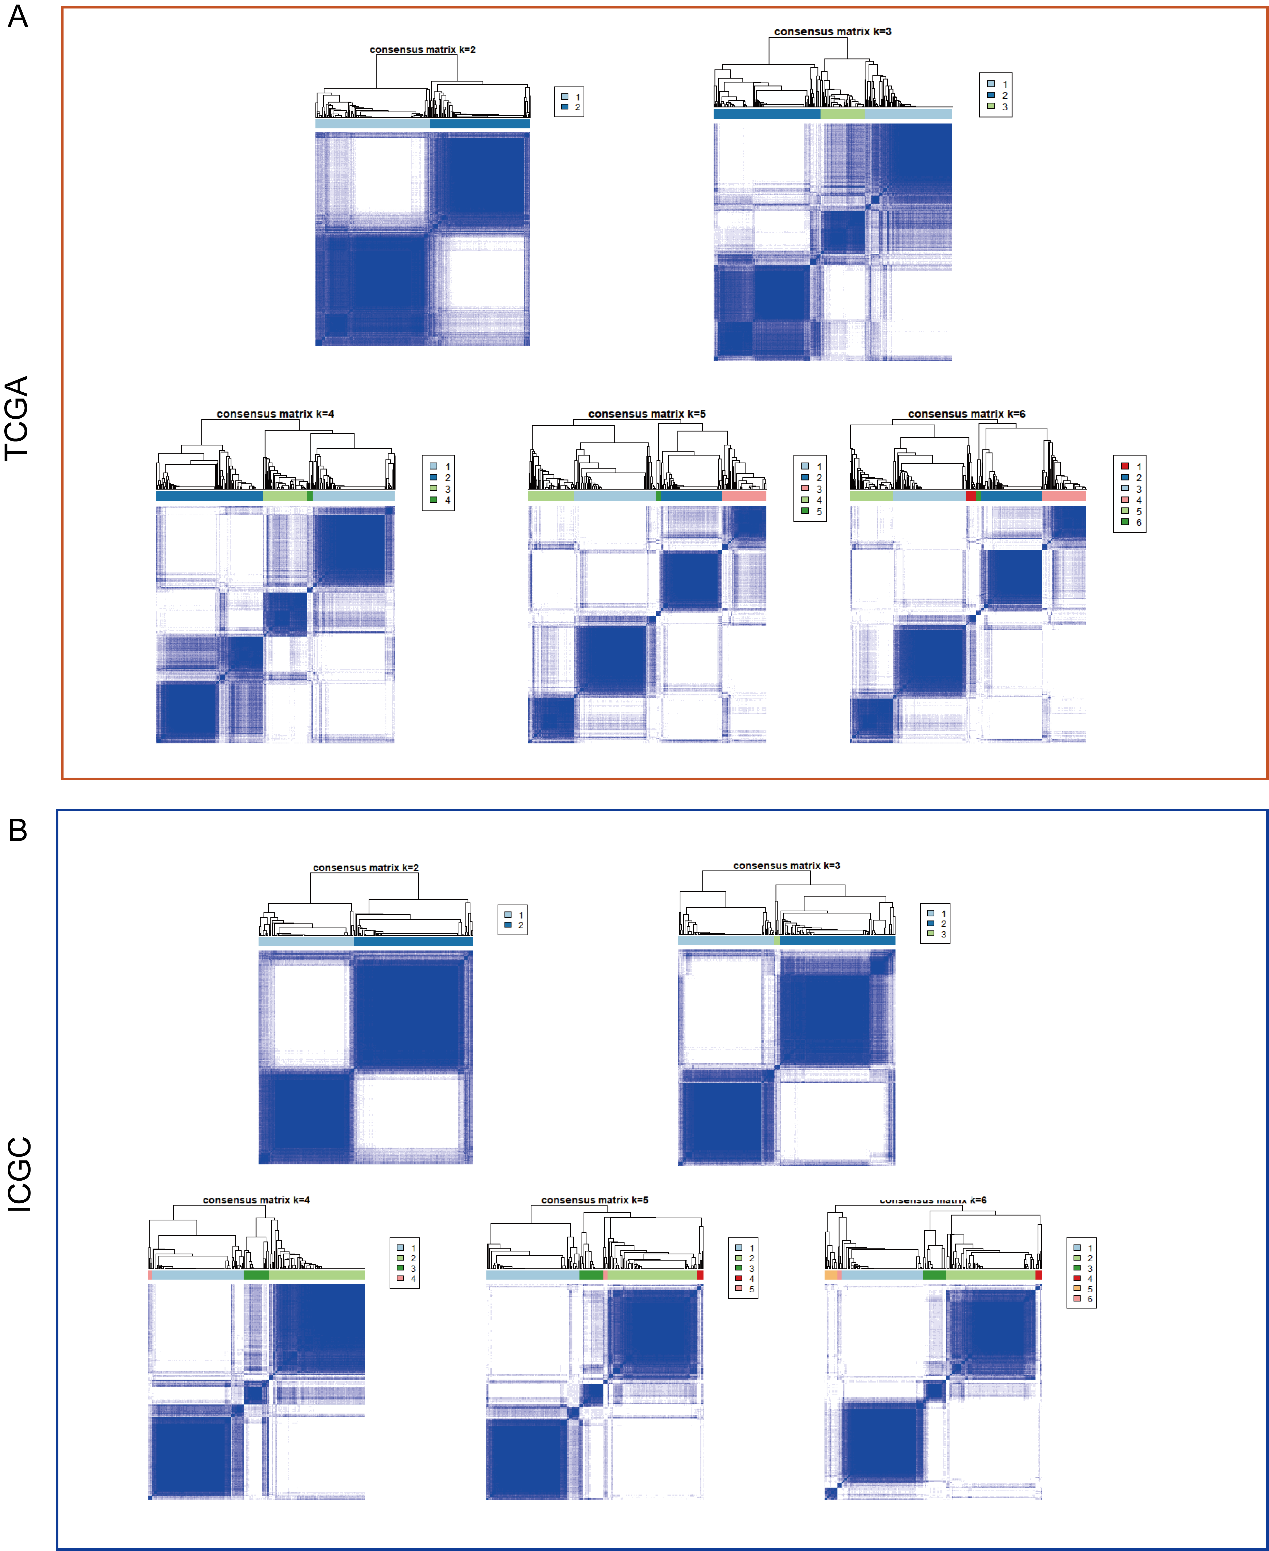


Figure S1. (A-B) The consensus score matrix of all samples when k = 2-6 based on TCGA-LIHC and ICGC.

**Figure S2.**


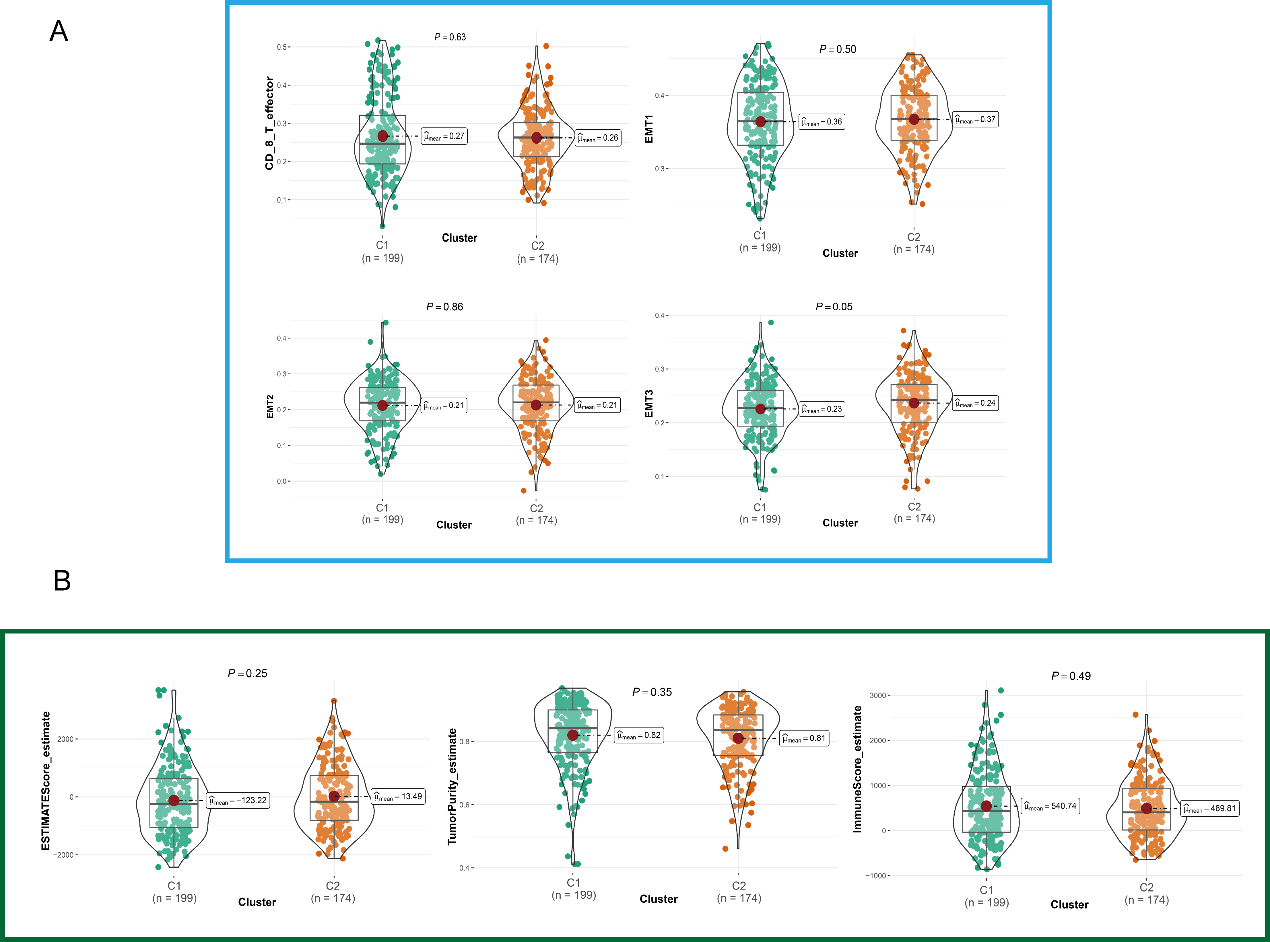


(A) The violin plots specifically showed the TME related scores of different NPC patterns (Welch's t-test).

(B) The violin plots specifically showed the differences in 2 NPC phenotypes in terms of ESTIMATEScore, Tumor Purity and Immune Score (Welch's t-test).

**Figure S3.**


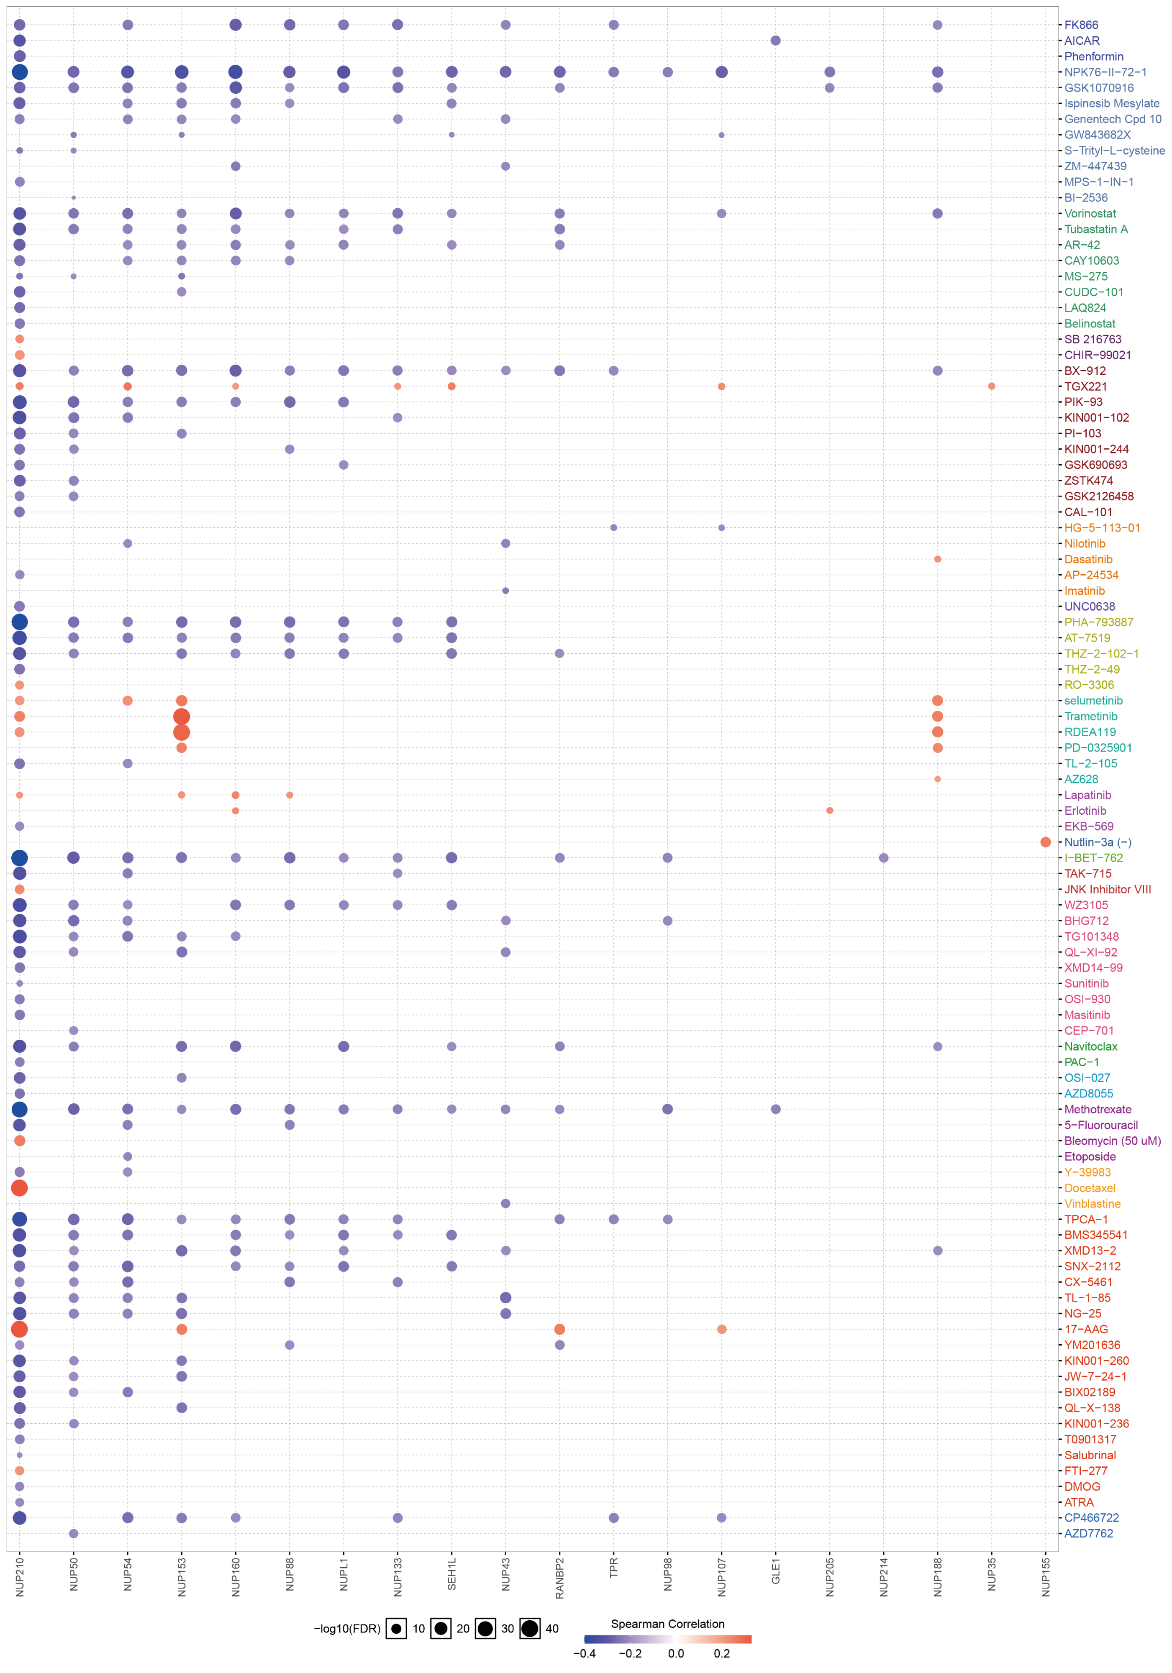


Figure S3. Correlation analysis of all NPC molecules and drug sensitivity (IC50) analysis in HCC, where red represents positive correlations and blue represents negative correlations. We used the drug susceptibility data from Genomics of Drug Sensitivity in Cancer (GDSC) database.

**Figure S4.**
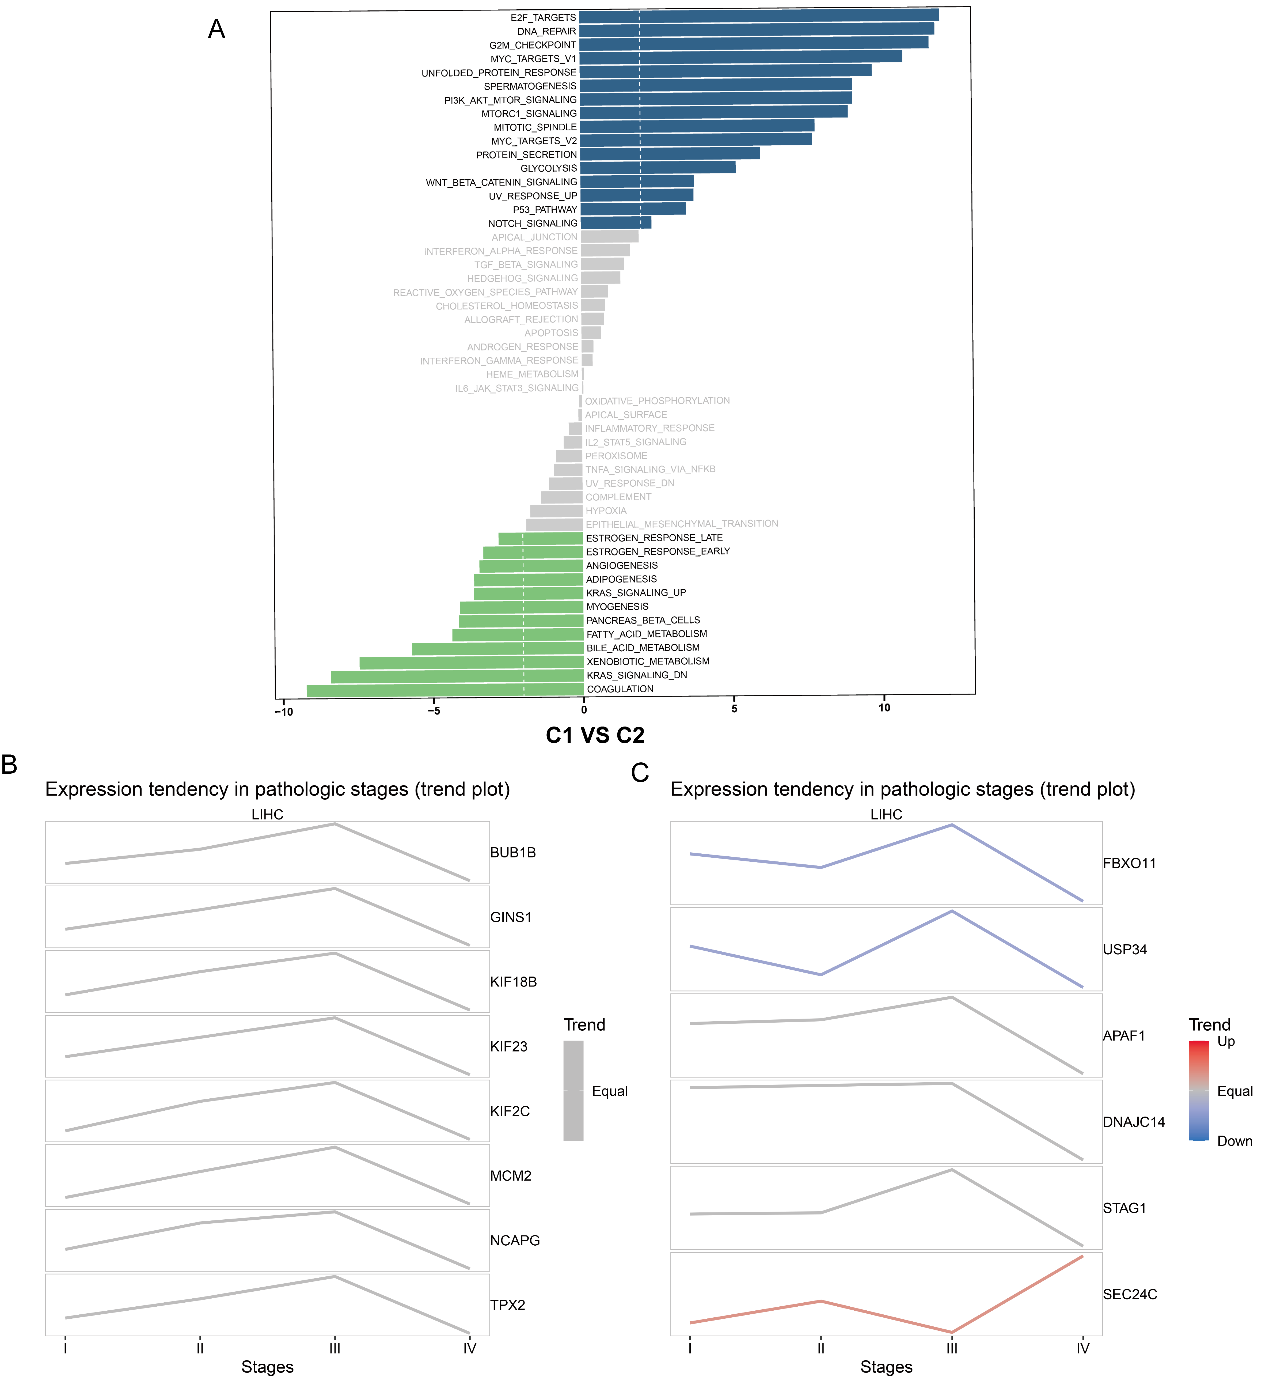


Figure S4. (A) Gene Set Variation Analysis (GSVA) enrichment analysis shows the activation status of biological pathways between 2 different NPC subtypes. Bar plot were used to visualize HALLMARK geneset, with blue representing activation and green representing inhibition in C1. Gray regions stand for not statistically significant. (B-C) Expression trends of the hub genes in C1_2 (B) and C1_9 (C) across different pathological stages (TCGA-LIHC).

**Figure S5.**
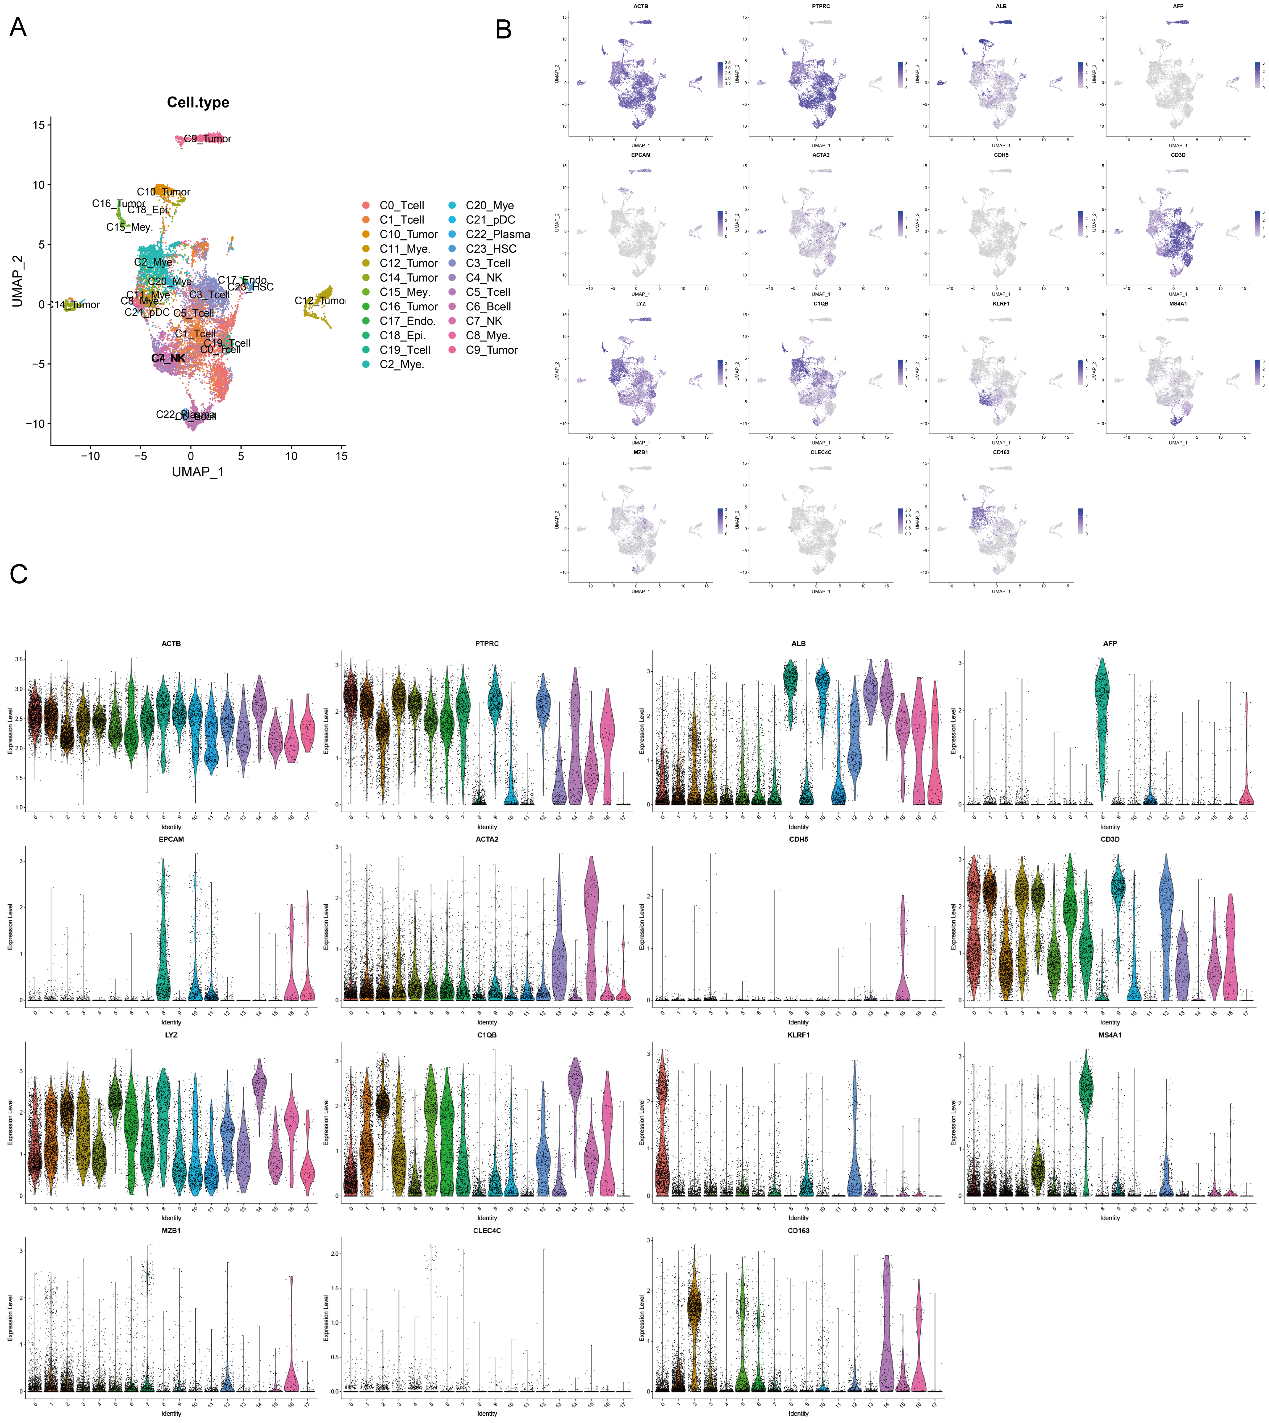


Figure S5. (A) UMAP displaying annotation information from authors of single-cell data sources. (B-C) The UMAP (B) and violin plots (C) showing the expression of cell type-specific gene markers in each cell cluster, respectively.

**Figure S6**


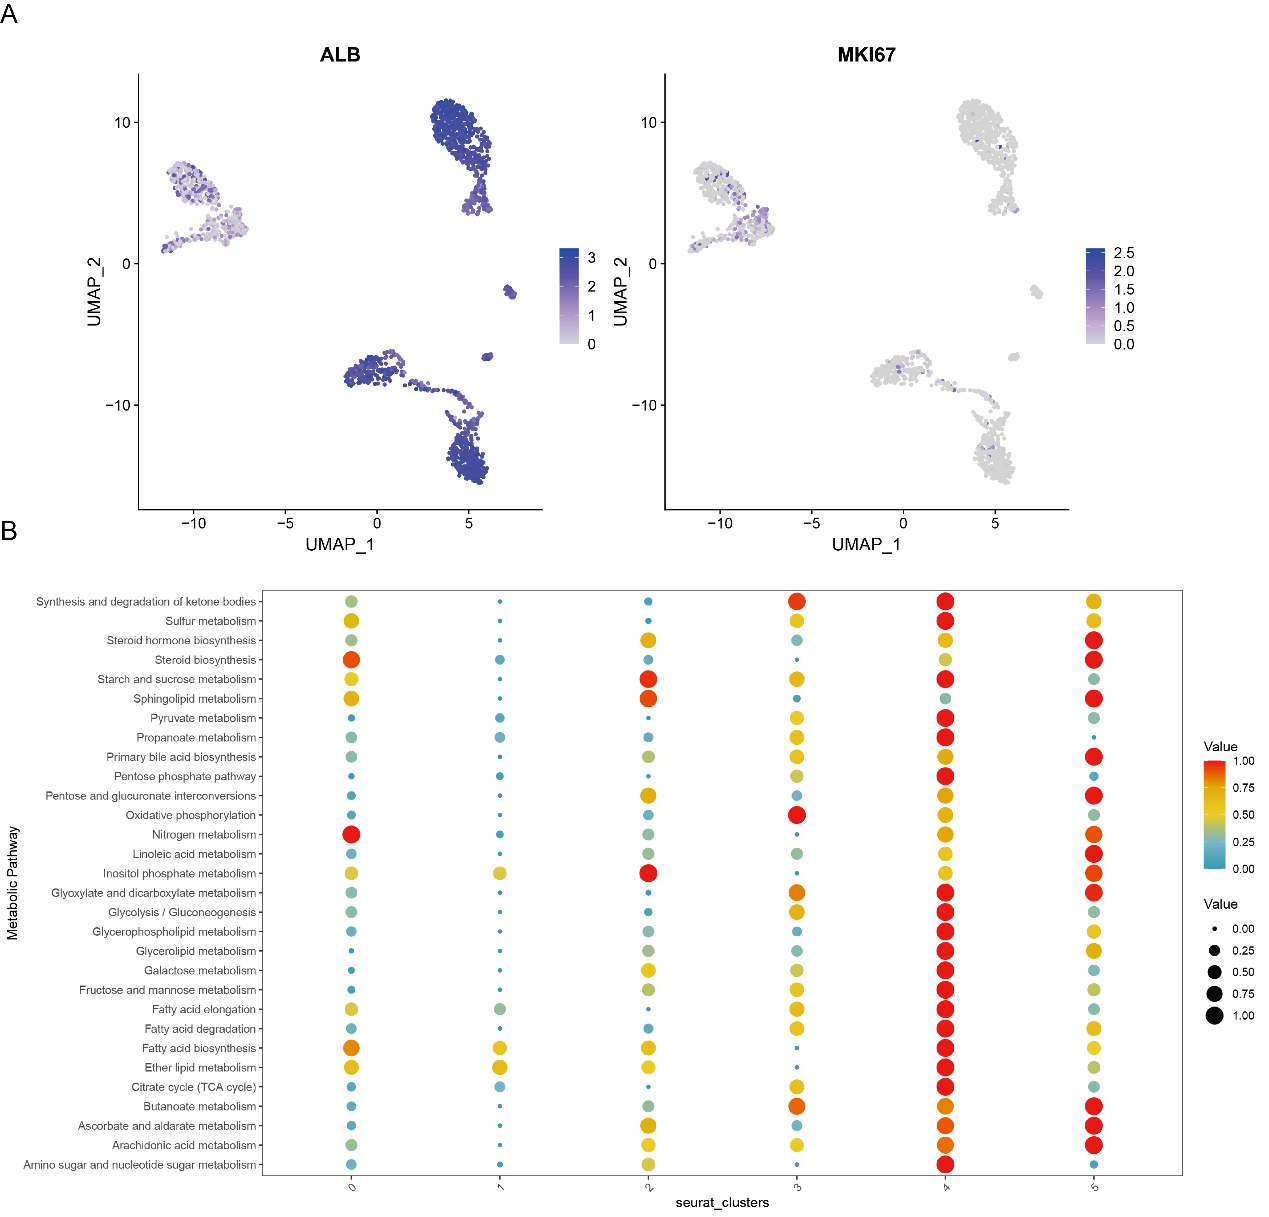


Figure S6. (A-B) UMAP demonstrating the expression of ALB and MKI67 in 1824 hepatocytes, respectively. (B) Metabolic levels of six hepatocyte clusters assessed by scMetabolism, with background gene sets derived from the Kyoto Encyclopedia of Genes and Genomes (KEGG). The degree of enrichment and the P value are represented using the color and size of the bubbles, respectively.

**Figure S7**


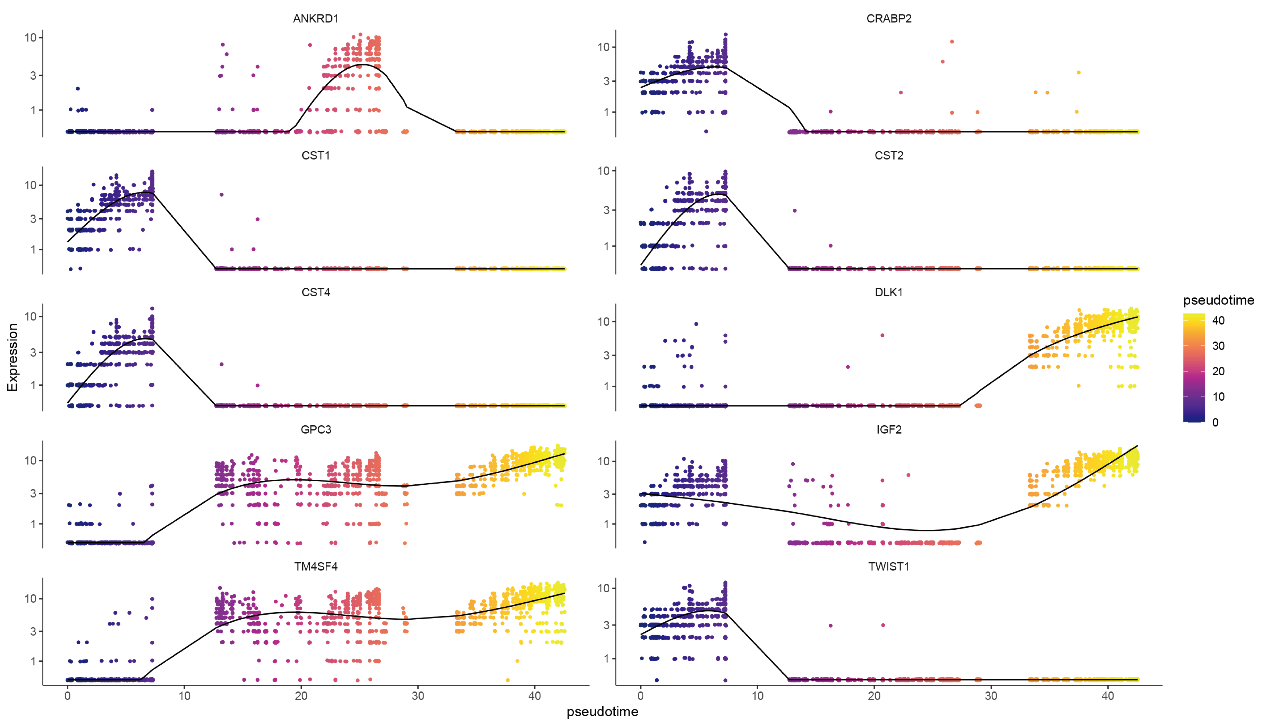


Figure S7. Ten genes with the most significant expression changes in pseudotime analysis for 1824 hepatocytes.


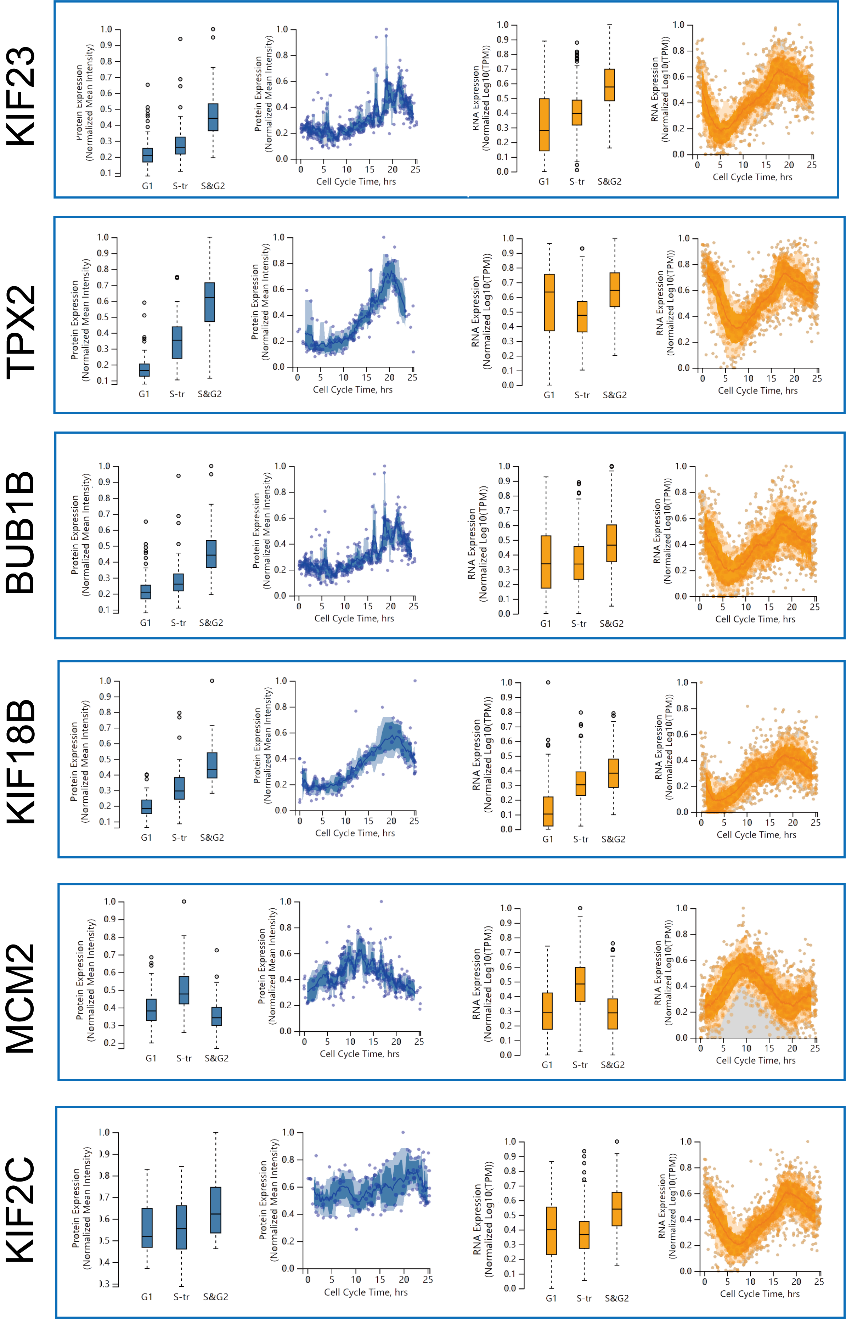
**Figure S8**

Figure S8. Relative expression levels of the hub genes in C1_2 at different cell division phases. Left: protein level (blue); right: transcriptome level (orange). Data are from HPA database, GINS1 and NCAPG related information are not included.

**Figure S9**


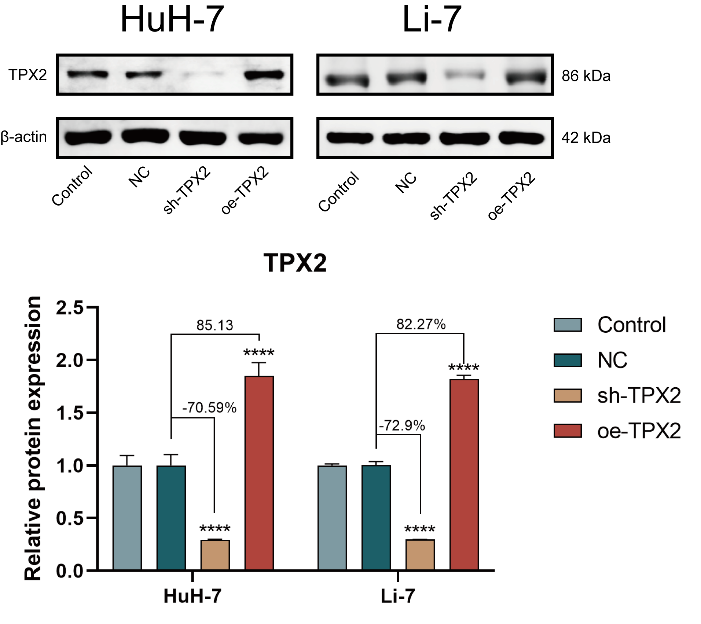


Figure S9. TPX2 expression in different HCC cell lines based on western blot. One-way ANOVA was conducted. Data in the bar chart are the means ± SME from three independent experiments (****P< 0.0001).

)

# Supplementary Table 1

| Antibodies and Reagents | Manufacturer, Country, Cat number | Concentration |
| --- | --- | --- |
| NUP98 (P671) Antibody | Cell Signaling Technology, US, # 2292S | IF 1:100 |
| NUP153 Polyclonal Antibody | Thermo Fisher Scientific, US, # A301-788A-T | IF 1:100 |
| Ki-67 Recombinant Rabbit Monoclonal Antibody | Thermo Fisher Scientific, US, # MA5-14520 | IHC 1:200  IF 1:200 |
| Anti-TPX2 Antibody | Abcam, UK, #ab264124 | IHC 1:200  IF 1:100 |
| HE staining kit | Beyotime Biotechnology, China, #C0105, | - |
| Goat Anti-Rabbit IgG H&L (HRP) | Abcam, UK, #ab205718 | IHC 1:2000 |
| Alexa Fluor 488 AffiniPure goat anti-mouse IgG (H+L) | FcMACS, China, #136908 | IF1:500 |
| Goat anti-mouse IgG (H+L) CoraLite594 | Proteintech, China, #SA00013-4 | IF 1:500 |
| Fluorescein (FITC) conjugated Affinipure Goat Anti-Rabbit IgG(H+L) | Proteintech, China, # SA00003-2 | IF 1:500 |
| Dulbecco’s modified Eagle’s medium (DMEM) | Gibco, USA, #8121032 | - |
| Fetal bovine serum (FBS) | Gibco, USA, # 42F1376K | - |
| Cell Counting Kit-8 | Tongren, Japan, # CK04 | - |
| TMR (red) TUNEL cell Apoptosis Detection Kit | Servicebio, China, #T2190 | - |
| Recombinant Human EGF  Animal-Free manufactured | Peprotech, USA, # AF-100-15 | 20ng/ml |
| Recombinant Human FGF-basic (154 a.a.) | Peprotech, USA, #100-18B-100 | 20ng/ml |
| B27 supplement | Gibco, USA, #17504044 | 2% |
| Plasmid vectors for *NDC153* | GeneChem, China, #GIEE082316 |  |
| Plasmid vectors for *NUP98* | GeneChem, China, # GIEE084573 |  |
| Puromycin | Beyotime Biotechnology, China, # 041321210517 |  |
| Lipofectamine 3000 | Invitrogen, USA, #2395298 |  |
| 0.2% TritonX-100 | Proteintech, China, #61202011 |  |
| Nuclei were stained using 4',6-diamidino-2-phenylindole (DAPI) | Beyotime Biotechnology, China, # 091620210520 |  |
| TMR (red) TUNEL cell Apoptosis Detection Kit | Servicebio, China, #XZ204302 |  |
|  |  |  |
|  |  |  |
|  |  |  |

# Supplementary Table 2

| Module.id | Module.size | Module.parent |
| --- | --- | --- |
| c1_2 | 187 | c1_1 |
| c1_4 | 25 | c1_2 |
| c1_5 | 81 | c1_2 |
| c1_6 | 63 | c1_2 |
| c1_7 | 18 | c1_2 |
| c1_8 | 15 | c1_3 |
| c1_9 | 126 | c1_3 |
| c1_10 | 20 | c1_3 |
| c1_11 | 81 | c1_3 |
| c1_12 | 59 | c1_3 |
| c1_13 | 82 | c1_3 |
| c1_14 | 41 | c1_3 |
| c1_15 | 70 | c1_3 |
| c1_16 | 37 | c1_3 |
| c1_17 | 43 | c1_3 |
| c1_18 | 28 | c1_3 |
| c1_19 | 34 | c1_3 |
| c1_20 | 23 | c1_3 |
| c1_21 | 27 | c1_3 |
| c1_22 | 24 | c1_3 |
| c1_24 | 13 | c1_3 |
| c1_25 | 10 | c1_3 |
| c1_26 | 12 | c1_3 |
| c1_27 | 11 | c1_3 |
| c1_28 | 21 | c1_4 |
| c1_30 | 69 | c1_5 |
| c1_33 | 24 | c1_6 |
| c1_35 | 13 | c1_6 |
| c1_38 | 64 | c1_9 |
| c1_40 | 14 | c1_9 |
| c1_44 | 13 | c1_10 |
| c1_45 | 63 | c1_11 |
| c1_46 | 18 | c1_11 |
| c1_48 | 29 | c1_12 |
| c1_51 | 69 | c1_13 |
| c1_53 | 36 | c1_14 |
| c1_55 | 43 | c1_15 |
| c1_59 | 17 | c1_16 |
| c1_60 | 27 | c1_17 |
| c1_63 | 13 | c1_18 |
| c1_65 | 18 | c1_20 |
| c1_68 | 21 | c1_21 |
| c1_69 | 10 | c1_22 |
| c1_72 | 13 | c1_28 |
| c1_73 | 12 | c1_30 |
| c1_75 | 53 | c1_45 |
